# Supplementary material
Source: PubMed Central journal article supplement (PMC5627342)
Supplement: mp7b00521_si_001.pdf [file mp7b00521_si_001.pdf]

## Supporting Information

### Design and Solidification of Fast-releasing Clofazimine Nanoparticles for Treatment of Cryptosporidiosis

Yingyue Zhang<sup>1</sup>, Jie Feng<sup>1</sup>, Simon A. McManus<sup>1</sup>, Hoang D. Lu<sup>1</sup>, Kurt D. Ristroph<sup>1</sup>, Eugene J. Cho<sup>1</sup>, Ellen L. Dobrijevic<sup>1</sup>, Hak-Kim Chan<sup>2</sup>, Robert K. Prud'homme<sup>1\*</sup>

1. Department of Chemical and Biological Engineering, Princeton University, Princeton, New Jersey 08854, United States

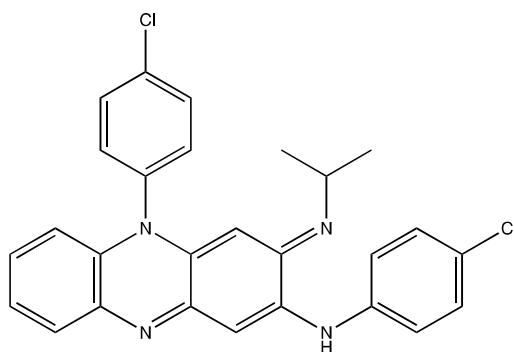

**Scheme S1.** Clofazimine Chemical Structure. Molecular weight: 473.4. Log P: 7.66. Chemical formula:  $C_{27}H_{22}Cl_2N_4$ .

**Table S1:** Specifications of AFFINISOL HPMCAS (provided by Dow at <http://www.dow.com/en-us/pharma/products/affinisol>)

| AFFINISOL™ HPMCAS      |               |               |               |
|------------------------|---------------|---------------|---------------|
|                        | 716           | 912           | 126           |
| Hydroxypropyl          | 5.0 – 9.0 %   | 5.0 – 9.0 %   | 6.0 – 10.0 %  |
| Methoxyl               | 20.0 – 24.0 % | 21.0 – 25.0 % | 22.0 – 26.0 % |
| Viscosity*             | 2.4 – 3.6 cP  | 2.4 – 3.6 cP  | 2.4 – 3.6 cP  |
| Residue on Ignition    | < 0.20 %      | < 0.20 %      | < 0.20 %      |
| Loss on Drying         | < 5.0 %       | < 5.0 %       | < 5.0 %       |
| Free Acids             | < 1.0 %       | < 1.0 %       | < 1.0 %       |
| Acetate Substitution   | 5.0-9.0 %     | 7.0 – 11.0 %  | 10.0 – 14.0 % |
| Succinate Substitution | 14.0- 18.0 %  | 10.0 – 14.0 % | 4.0 – 8.0 %   |
| Acetic Acid            | 0.5 %         | 0.5 %         | 0.5 %         |

\* Viscosity determined as a 2 % solution in NaOH solution

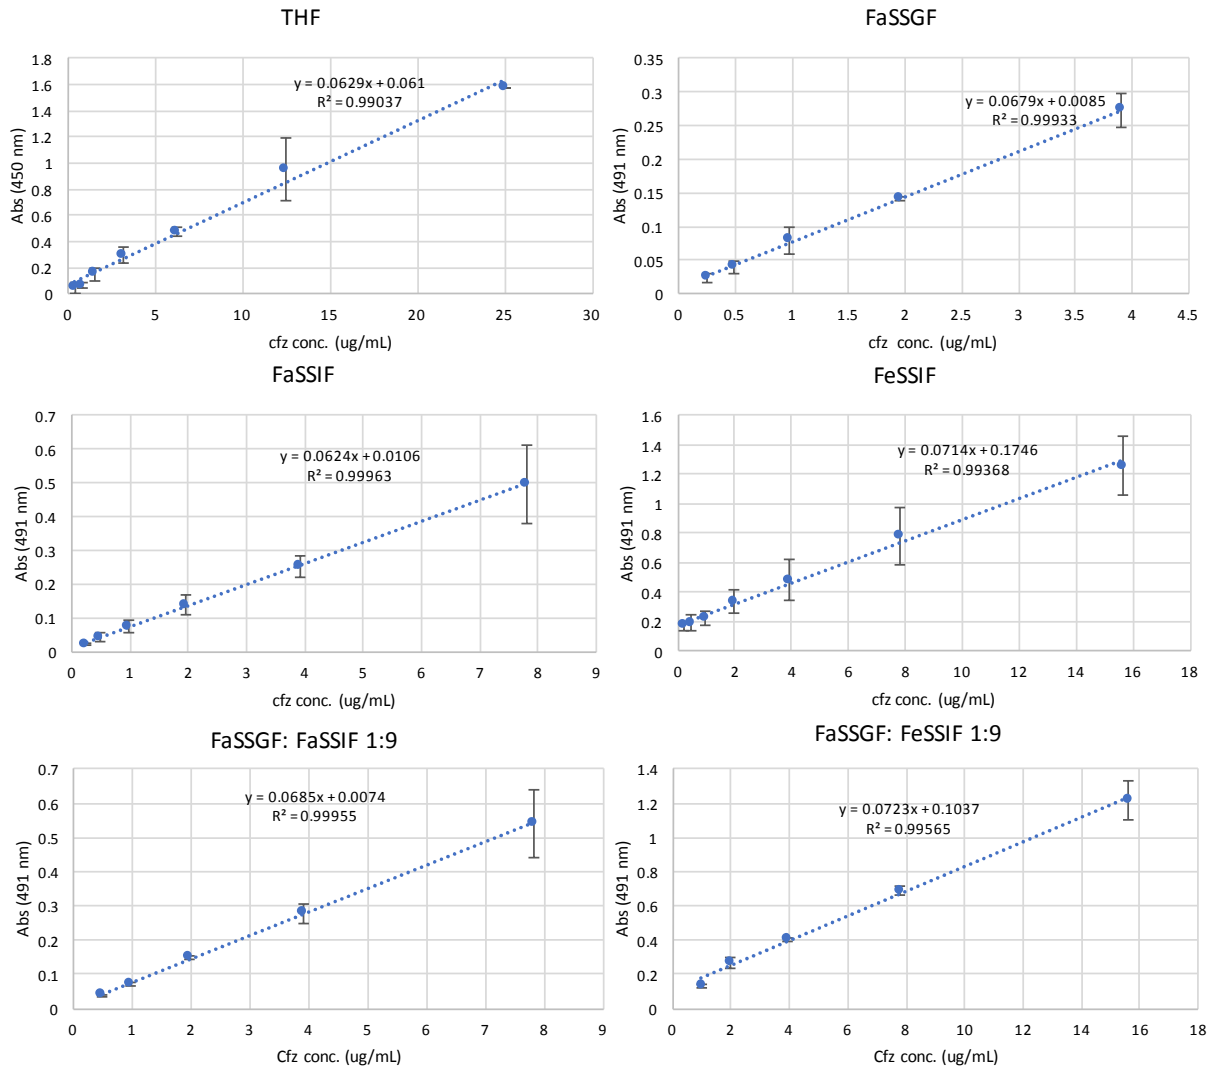

**Figure S1.** Clofazimine calibration curves in THF, FaSSGF, FaSSIF, and FeSSIF for determining clofazimine powder solubility. Clofazimine calibration curves in FaSSGF:FaSSIF 1:9 and FaSSGF: FeSSIF 1:9 for determining clofazimine release rate *in vitro*.

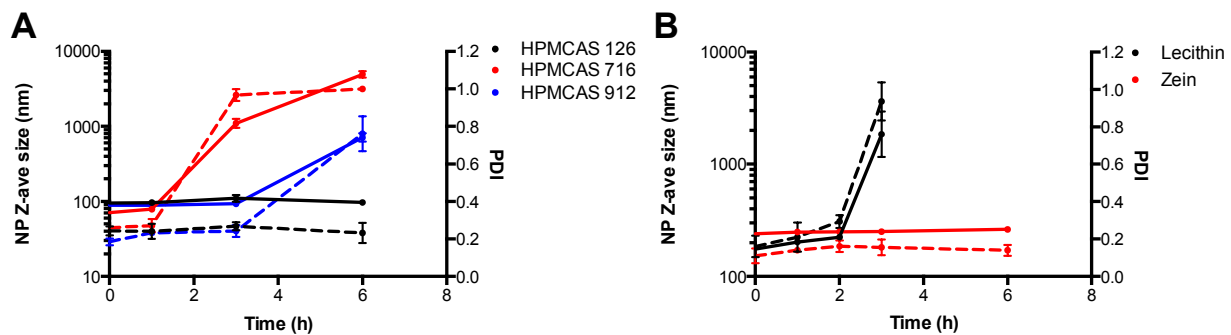

**Figure S2.** Size stability of clofazimine nanoparticles with various surface coatings in 10 vol% organics (A: HPMCAS, B: lecithin and zein). Solid line and dashed line represent nanoparticle Z-ave size and PDI, respectively.

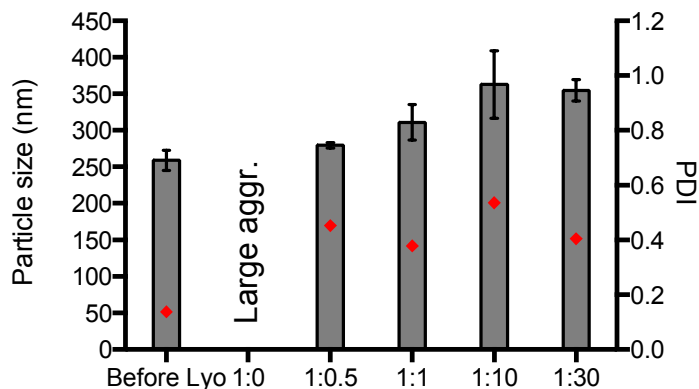

**Figure S3.** Particle size and PDI of clofazimine zein nanoparticles after lyophilization with different concentrations of mannitol as cryoprotectant. Grey bar represents particle size while red dot denotes corresponding PDI value.

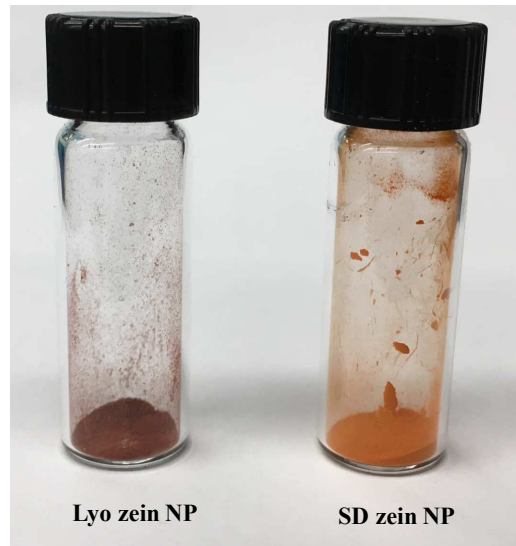

**Figure S4.** Appearance of lyophilized and spray-dried zein nanoparticles.

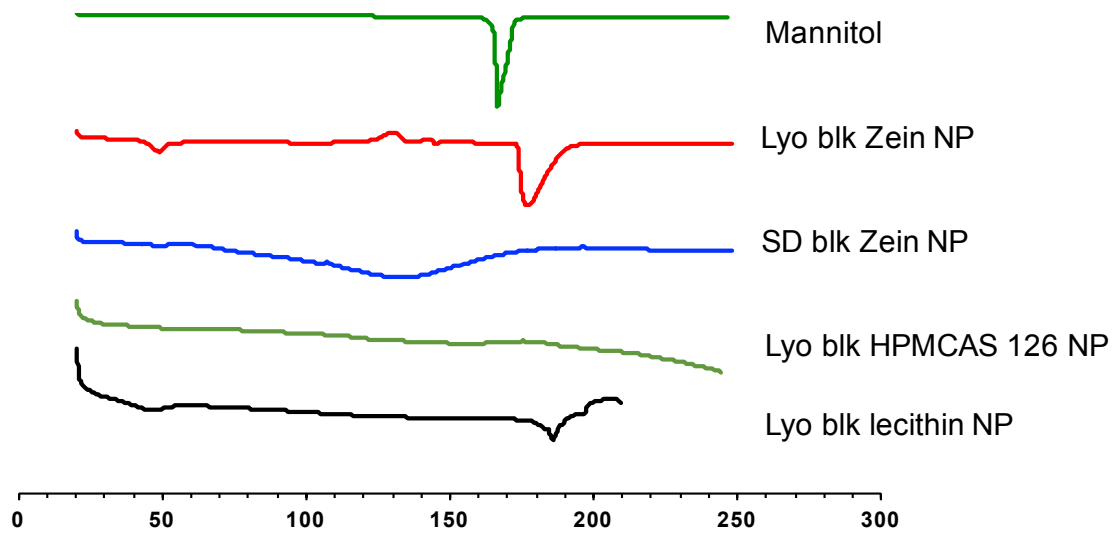

**Figure S5.** DSC traces of control samples. Blank nanoparticles were produced by FNP and lyophilized or spray-dried with same conditions as their corresponding clofazimine encapsulated nanoparticles.

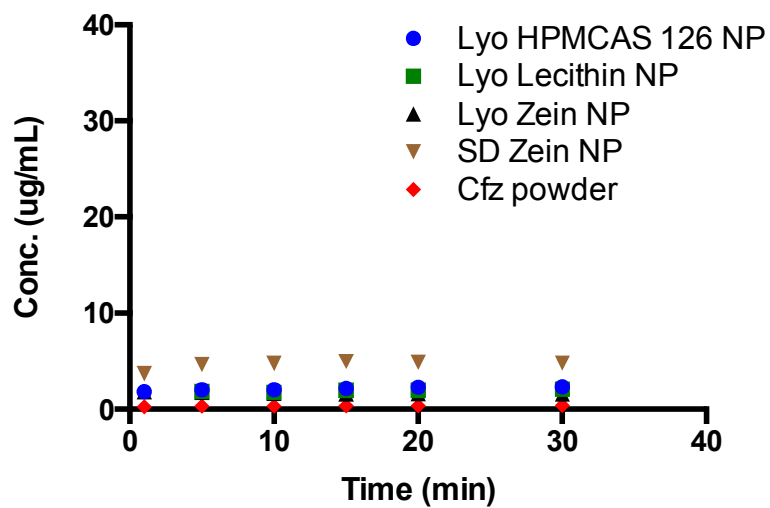

**Figure S6.** Dissolution of clofazimine nanoparticles with different stabilizers compared with free clofazimine (Cfz) powder in DI water at 37 °C.
